# Supplementary material for: Syndrome of Transient Headache and Neurologic Deficits with Cerebrospinal Fluid Lymphocytosis (HaNDL): HHV-7 Finding in Cerebrospinal Fluid Challenges Diagnostic Criteria
Source: MDPI journal article supplement (doi:10.3390/pathogens12030476), 2023-03-17
Supplement: s1 [file s1]

Table S5. Comparison of virus encephalitis HaNDL symptoms in the current case

| Symptom                 | Viral encephalitis | Present HaNDL case |
|-------------------------|--------------------|--------------------|
| Neck stiffness          | Yes                | No                 |
| Fever                   | Yes                | No                 |
| Neurological symptoms   | Yes                | Yes                |
| Changes in mental state | Yes                | Yes                |

Abbreviations: HaNDL, Syndrome of transient headache and neurologic deficits with cerebrospinal fluid lymphocytosis.
