# Supplementary material for: Syndrome of Transient Headache and Neurologic Deficits with Cerebrospinal Fluid Lymphocytosis (HaNDL): HHV-7 Finding in Cerebrospinal Fluid Challenges Diagnostic Criteria
Source: MDPI journal article supplement (doi:10.3390/pathogens12030476), 2023-03-17
Supplement: s1 [file s1]

Table S2. Examinations performed

| Examination                                                                                                   | Finding                                                                                     |
|---------------------------------------------------------------------------------------------------------------|---------------------------------------------------------------------------------------------|
| CT scan of the brain and angiography (day 1 and day 16)                                                       | Normal                                                                                      |
| Urine toxicology screening (day 1)                                                                            | Positive for opioids*<br>Positive for THC**                                                 |
| Magnetic tomography inclusive intravenous contrast and spectroscopy (day 3)                                   | Normal                                                                                      |
| EEG (day 4)                                                                                                   | Mild to a moderate focal abnormality with slower wave activity in the left temporal region. |
| Immunodeficiency panel, B and T cells (day 48)                                                                | Normal                                                                                      |
| Abbreviations: CT = computed tomography, EEG = electro encephalography, THC = (delta-9-tetrahydrocannabinol). |                                                                                             |
| * the patient had received 5 mg morphine and 0.3 mg alfentanil during transportation to the hospital          |                                                                                             |
| ** the patient had smoked cannabis two days prior to admission.                                               |                                                                                             |
