# Supplementary material for: Syndrome of Transient Headache and Neurologic Deficits with Cerebrospinal Fluid Lymphocytosis (HaNDL): HHV-7 Finding in Cerebrospinal Fluid Challenges Diagnostic Criteria
Source: MDPI journal article supplement (doi:10.3390/pathogens12030476), 2023-03-17
Supplement: s1 [file s1]

Table S3. HaNDL diagnostic criteria (7.3.5) in ICHD-3 chapter 7.3 Headache attributed to non-infectious inflammatory intracranial disease

| ICHHD-3<br>HaNDL<br>criteria             | Text of each criterion                                                                                                                                                                       | Day 1-27 | Day 28-48 |
|------------------------------------------|----------------------------------------------------------------------------------------------------------------------------------------------------------------------------------------------|----------|-----------|
| <b>A</b>                                 | Episodes of migraine-like headache fulfilling criteria B and C <sup>1</sup>                                                                                                                  | Yes      | Yes       |
| <b>B</b>                                 | Both of the following ( B1 and B2)                                                                                                                                                           | Yes      | Yes       |
| <b>B1</b>                                | accompanied or shortly preceded by onset of at least one of the following transient neurological deficits lasting >4 hours                                                                   | Yes      | Yes       |
| <b>B1a</b>                               | Hemiparaesthesia                                                                                                                                                                             | Yes      | Yes       |
| <b>B1b</b>                               | Dysphasia                                                                                                                                                                                    | Yes      | Yes       |
| <b>B1c</b>                               | Hemiparesis                                                                                                                                                                                  | Yes      | Yes       |
| <b>B2</b>                                | Associated with cerebrospinal fluid (CSF) lymphocytic pleocytosis (>15 white cells per µl), with negative aetiological studies                                                               | Yes      | Yes       |
| <b>C</b>                                 | Evidence of causation demonstrated by either or both of the following ( C1, C2)                                                                                                              | Yes      | Yes       |
| <b>C1</b>                                | Headache and transient neurological deficits have developed or significantly worsened in temporal relation to onset or worsening of the CSF lymphocytic pleocytosis, or led to its discovery | Yes      | Yes       |
| <b>C2</b>                                | Headache and transient neurological deficits have significantly improved in parallel with improvement in the CSF lymphocytic pleocytosis                                                     | Yes      | Yes       |
| <b>D</b>                                 | Not better accounted for by another ICHD-3 diagnosis                                                                                                                                         | No       | No        |
| <b>Fulfillment ICHD-3 HaNDL criteria</b> |                                                                                                                                                                                              | Yes      | No*       |

Abbreviations: ICHD-3, International Classification of Headache Disorders (3rd ed.); HaNDL, syndrome of transient headache and neurologic deficits with cerebrospinal fluid lymphocytosis \*Positive aetiological studies:low concentration of HHV-7 in CSF.
