# Supplementary material for: Syndrome of Transient Headache and Neurologic Deficits with Cerebrospinal Fluid Lymphocytosis (HaNDL): HHV-7 Finding in Cerebrospinal Fluid Challenges Diagnostic Criteria
Source: MDPI journal article supplement (doi:10.3390/pathogens12030476), 2023-03-17
Supplement: s1 [file s1]

Table S4. Fulfillment of ICHD-3 diagnostic criteria 9.1.2\*Headache attributed to viral meningitis or encephalitis in chapter 9. Headache attributed to infection

| ICHD-3 criteria Headache attributed to viral meningitis or encephalitis | Text of each criterion                                                                                   | Day 1-27 | Day 28-48 |
|-------------------------------------------------------------------------|----------------------------------------------------------------------------------------------------------|----------|-----------|
| <b>A</b>                                                                | Any headache fulfilling criterion C                                                                      | No       | No        |
| <b>B</b>                                                                | Viral meningitis or encephalitis has been diagnosed                                                      | No       | No        |
| <b>C</b>                                                                | Evidence of causation demonstrated by at least two of the following                                      | No       | No        |
| <b>C1</b>                                                               | headache has developed in temporal relation to the onset of the viral meningitis or encephalitis         | No       | No        |
| <b>C2</b>                                                               | headache has significantly worsened in parallel with worsening of the viral meningitis or encephalitis   | No       | No        |
| <b>C3</b>                                                               | headache has significantly improved in parallel with improvement in the viral meningitis or encephalitis | No       | No        |
| <b>C4</b>                                                               | headache is either or both of the following: holocranial or located in nuchal area                       | No       | No        |
| <b>D</b>                                                                | Not better accounted for by another ICHD-3 diagnosis                                                     | No       | No        |
| <b>Fulfillment ICHD-3, 9.1.2 criteria</b>                               |                                                                                                          | No       | No        |

**Abbreviations:** ICHD-3, International Classification of Headache Disorders (3rd ed.); **\*Description ICHD-3, 9.1.2 Headache attributed to viral meningitis or encephalitis:** typically with neck stiffness and fever and variably associated, according to the extent of the infection, with neurological symptoms and/or signs including changes in mental state.
