# Supplementary material for: Syndrome of Transient Headache and Neurologic Deficits with Cerebrospinal Fluid Lymphocytosis (HaNDL): HHV-7 Finding in Cerebrospinal Fluid Challenges Diagnostic Criteria
Source: MDPI journal article supplement (doi:10.3390/pathogens12030476), 2023-03-17
Supplement: s1 [file s1]

Table S1. Laboratory screening tests over time for infectious and autoimmune disorders

| Laboratory tests (reference value) | Day 1 | Day 4 | Day 28 | Day 48 |
|------------------------------------|-------|-------|--------|--------|
| <b>CSF analysis</b>                |       |       |        |        |
| <b>Bacterial culture</b>           | neg   | N/A   | neg    | N/A    |
| <b>PCR CMV</b>                     | neg   | N/A   | N/A    | N/A    |
| <b>PCR EBV</b>                     | neg   | N/A   | N/A    | N/A    |
| <b>Enterovirus RNA</b>             | neg   | neg   | neg    | N/A    |
| <b>PCR HSV 1 and HSV2</b>          | neg   | neg   | neg    | N/A    |
| <b>PCR VZV</b>                     | neg   | neg   | N/A    | N/A    |
| <b>PCR HHV-6A and HHV-6B</b>       | neg   | N/A   | neg    | N/A    |
| <b>Borrelia IgM and IgG</b>        | N/A   | neg   | neg    | N/A    |
| <b>Syphilis TPPA</b>               | N/A   | neg   | neg    | N/A    |
| <b>Pneumococcus DNA</b>            | N/A   | N/A   | neg    | N/A    |
| <b>Meningococcus DNA</b>           | N/A   | N/A   | neg    | N/A    |
| <b>Haemophilus influenzae</b>      | N/A   | N/A   | neg    | N/A    |
| <b>ACE (&lt;2.0 E/L)</b>           | N/A   | N/A   | <2.0   | N/A    |
| <b>HHV-7- DNA</b>                  | N/A   | N/A   | pos*   | N/A    |
| <b>Serum analysis</b>              |       |       |        |        |
| <b>TBE virus IgM and IgG</b>       | neg   | N/A   | N/A    | N/A    |
| <b>Borrelia IgM</b>                | N/A   | neg   | Neg    | N/A    |
| <b>Borrelia IgG</b>                | N/A   | pos   | pos    | N/A    |
| <b>HIV1/HIV2-Ag/Ab</b>             | N/A   | neg   | N/A    | N/A    |
| <b>Syphilis TPPA</b>               | N/A   | N/A   | neg    | N/A    |
| <b>Neuronal antibodies</b>         | neg   | N/A   | N/A    | N/A    |
| <b>Paraneoplastic antibodies</b>   | neg   | N/A   | N/A    | N/A    |
| <b>ACE (E/L) normal &lt;70</b>     | N/A   | 18.0  | 18.3   | N/A    |
| <b>CEA (ug/L) normal &lt;4.7</b>   | N/A   | <1.0  | N/A    | N/A    |
| <b>Urine analysis</b>              |       |       |        |        |

|                                   |     |     |     |     |
|-----------------------------------|-----|-----|-----|-----|
| <b>Bacterial culture</b>          | N/A | neg | N/A | N/A |
| <b>Chlamydia trachomatis DNA</b>  | N/A | neg | N/A | N/A |
| <b>Gonococcus DNA</b>             | N/A | neg | N/A | N/A |
| <b>Nasopharynx test</b>           |     |     |     |     |
| <b>Coronavirus SARS-CoV-2-RNA</b> | N/A | neg | N/A | N/A |

Abbreviations: Ab = antibodies; ACE = angiotensin-converting enzyme; Ag = antigen; CEA = carcinoembryonic antigen; CMV= Cytomegalovirus; CSF = cerebrospinal fluid; DNA = deoxyribonucleic acid; EBV = Epstein-Barr virus; N/A = not available; HHV=human herpes virus; HIV = human immunodeficiency virus; HSV= herpes simplex virus; Ig = immunoglobulin; ug = microgram; ml= milliliter; N/A = Not available; RNA = ribonucleic acid; SARS-CoV-2 = severe acute respiratory syndrome coronavirus 2 (covid-19); TBE = tick-borne encephalitis; TPPA = treponema pallidum particle agglutination assay; u = urine; VZV = varicella-zoster virus

\*1.70, 10-log by number of genome equivalents/ml
